# Supplementary material for: Genome-wide identification and characterization of GRAS transcription factors in tomato (Solanum lycopersicum)
Source: PeerJ. 2017 Nov 8;5:e3955. doi: 10.7717/peerj.3955 (PMC5681854; doi:10.7717/peerj.3955)
Supplement: Table S1 [file peerj-05-3955-s001.xlsx]

## Sheet: table 1
ID	length	position	chr.	Synonym	HMM_Evalue	gene start	gene end
Solyc01g008910.2.1	476	25-473	chr1	SCL3	4.4e-139	2935721	2937612
Solyc01g009840.1.1	251	1-251	chr1	SCL3	7.4e-21	4339399	4340963
Solyc01g059950.1.1	280	1-196	chr1	RGL2	4.3e-38	69269146	60272222
Solyc01g059960.1.1	472	1-196	chr1	RGL2	5e-44	69280067	69281794
Solyc01g079370.2.1	844	446-842	chr1	RGL1	2.3e-89	78455070	78458816
Solyc01g079380.1.1	495	97-493	chr1	RGL2	7.3e-92	78461991	78463478
Solyc01g090950.2.1	769	382-768	chr1	SCL22	1.3e-101	84656078	84658972
Solyc01g100200.2.1	666	260-657	chr1	GRAS4	2.6e-109	90259397	90261861
Solyc02g085340.1.1	609	214-608	chr2	SCL4	1.3e-106	48257032	48258861
Solyc02g085600.1.1	536	148-535	chr2	SCL15	5.8e-99	48430009	48431619
Solyc02g092370.1.1	507	101-506	chr2	SHR	2.3e-103	53456887	53458410
Solyc02g092570.1.1	438	28-435	chr2	SCL32	5.9e-92	53622718	53624034
Solyc02g094340.1.1	680	289-679	chr2	RGA 1	3.4e-130	54894729	54897225
Solyc03g025170.1.1	631	236-631	chr3	SCL8	7.6e-106	2625853	2627748
Solyc03g110950.1.1	530	131-529	chr3	RGL1	1.6e-113	61674859	61676451
Solyc03g123400.1.1	542	134-541	chr3	NSP1_MEDTR	3e-72	70264775	70266403
Solyc04g011630.1.1	170	1-167	chr4	SCL14	1e-43	4103629	4104141
Solyc04g014830.1.1	553	148-544	chr4	SCL13	1.8e-126	5064579	5066240
Solyc04g064550.1.1	563	167-563	chr4	SCL1	6e-133	55726990	55728681
Solyc05g053090.1.1	743	344-740	chr5	SCL14	1.9e-114	63211136	63213367
Solyc05g053420.1.1	472	74-470	chr5	RGA-like 2	3e-82	63511853	63513271
Solyc05g054170.2.1	333	144-333	chr5	SCL13	3.6e-34	64111515	64112957
Solyc06g009610.1.1	864	468-862	chr6	RGA-like 1	3.2e-90	3575306	3578741
Solyc06g035620.2.1	326	1-318	chr6		3.6e-84	24667330	24668828
Solyc06g036170.1.1	598	202-597	chr6	SCL8	1.1e-101	25637986	25639782
Solyc06g076280.1.1	748	348-745	chr6	SCL14	7.6e-108	47399479	47401725
Solyc06g076290.1.1	125	1-125	chr6	SCL30/SCL14	3.1e-10	47403325	47404076
Solyc06g082530.1.1	653	251-649	chr6	scl9	1.2e-105	48317827	48319788
Solyc07g043330.1.1	432	43-429	chr7	SCL23	5.1e-110	57032433	57033731
Solyc07g047950.1.1	545	149-545	chr7	PAT1	1.5e-135	59174275	59175912
Solyc07g052960.1.1	429	11-416	chr7	SCL32	2.4e-91	61367195	61368484
Solyc07g063940.1.1	583	187-582	chr7	GRAS2	2.5e-124	66264913	66266664
Solyc07g065270.1.1	538	142-538	chr7	PAT1	2.5e-133	67097735	67099351
Solyc07g066250.1.1	428	23-428	chr7	SCL18	3.4e-131	67734548	67735834
Solyc08g014030.1.1	418	4-408	chr8	SHR	3.7e-96	3631250	3632506
Solyc08g078800.1.1	474	85-473	chr8	SCL22	1.5e-84	62517241	62518665
Solyc08g080400.1.1	679	271-664	chr8	SCL28	1e-127	63684338	63686377
Solyc09g090830.2.1	319	258-305	chr9		1.7e-08	70238989	70241675
Solyc09g010920.1.1	761	361-759	chr9	SCL9	2.8e-112	4259085	4261370
Solyc09g018460.1.1	500	107-499	chr9		1.6e-46	14933729	14935231
Solyc09g066450.1.1	500	114-495	chr9	SCR	8.8e-104	64864778	64866280
Solyc10g074680.1.1	826	421-807	chr10	SCL	9.3e-124	58229454	58233218
Solyc10g086370.1.1	510	112-505	chr10	GAI(DELLA)	7.2e-94	65218718	65220250
Solyc10g086380.1.1	513	111-505	chr10	GAI(DELLA)	6.4e-114	65222229	65223770
Solyc10g086530.1.1	761	361-759	chr10	SCL9	5.9e-111	65322155	65324440
Solyc11g005610.1.1	492	84-477	chr11		3.4e-80	474688	476166
Solyc11g011260.1.1	588	173-574	chr11	GAI(DELLA)	2.9e-137	4303769	4305535
Solyc11g012510.1.1	542	146-542	chr11	SCL13	3.2e-125	5329768	5331396
Solyc11g013150.1.1	487	78-481	chr11		8.1e-101	6017978	6019441
Solyc11g017100.1.1	476	65-472	chr11	SCL21	2.7e-80	7898735	7900165
Solyc12g005340.1.1	558	162-557	chr12		4.2e-124	211757	213433
Solyc12g049320.1.1	267	132-267	chr12		6.7e-13	37064111	37064987
Solyc12g099220.1.1	575	164-560	chr12	RGL1	5e-85	66438306	66440307
Solyc12g099900.1.1	468	21-465	chr12	SCL3	4.7e-144	66846300	66847706
