# Supplementary material for: Genome-wide identification and characterization of GRAS transcription factors in tomato (Solanum lycopersicum)
Source: PeerJ. 2017 Nov 8;5:e3955. doi: 10.7717/peerj.3955 (PMC5681854; doi:10.7717/peerj.3955)
Supplement: Table S2 [file peerj-05-3955-s002.xlsx]

## Sheet: Sheet1
tandem duplication
number(pair)	gene
1	Solyc01g059950.1.1	Solyc01g059960.1.1
2	Solyc01g079370.2.1	Solyc01g079380.1.1
3	Solyc06g076280.1.1	Solyc06g076290.1.1
4	Solyc10g086370.1.1	Solyc10g086380.1.1
5	Solyc12g099220.1.1	Solyc12g099900.1.1
segmental duplication
number(pair)	gene
1	Solyc05g054170.2.1	Solyc11g012510.1.1
2	Solyc06g035620.2.1	Solyc12g005340.1.1
3	Solyc03g025170.1.1	Solyc06g036170.1.1
4	Solyc09g010920.1.1	Solyc10g086530.1.1
5	Solyc01g079370.2.1	Solyc06g009610.1.1
6	Solyc05g053420.1.1	Solyc12g099220.1.1
7	Solyc07g043330.1.1	Solyc09g066450.1.1
8	Solyc01g008910.2.1	Solyc12g099900.1.1
